# Supplementary material for: The Polymorphisms in Methylenetetrahydrofolate Reductase, Methionine Synthase, Methionine Synthase Reductase, and the Risk of Colorectal Cancer
Source: PubMed Central journal article supplement — Int J Biol Sci. 2012 Jun 8;8(6):819–30. doi: 10.7150/ijbs.4462 (PMC3372886; doi:10.7150/ijbs.4462), 2012-06-08
Supplement: ijbsv08p0819s1.pdf [file ijbsv08p0819s1.pdf]

**Supplementary Table 1. Characteristics of studies included in the meta-analysis**

| First author       | Year | Country   | Ethnicity              | Source of controls | Genotype distribution |     |     |          |     |     | PHWE <sup>c</sup> |
|--------------------|------|-----------|------------------------|--------------------|-----------------------|-----|-----|----------|-----|-----|-------------------|
|                    |      |           |                        |                    | Cases                 |     |     | Controls |     |     |                   |
| <i>MTHFR677T</i>   |      |           |                        |                    |                       |     |     |          |     |     |                   |
| Sammer et al.      | 2011 | India     | Indian                 | Healthy person     | 59                    | 18  | 9   | 121      | 27  | 12  | 0.000             |
| Pardini et al.     | 2011 | Czech     | Caucasian              | Hospital patients  | 281                   | 309 | 76  | 583      | 638 | 156 | 0.349             |
| Jokic et al.       | 2011 | Croatia   | Caucasian              | Healthy person     | 139                   | 130 | 31  | 142      | 130 | 28  | 0.823             |
| Guimaraes et al.   | 2010 | Brazilian | African-Brazilians     | Hospital patients  | 48                    | 50  | 15  | 92       | 79  | 17  | 0.994             |
| Cui et al.         | 2010 | Korea     | Asian                  | Healthy person     | 622                   | 923 | 284 | 540      | 863 | 297 | 0.133             |
| Fernandez-Peralta  | 2009 | Spanish   | Caucasian              | Hospital patients  | 89                    | 52  | 2   | 44       | 50  | 9   | 0.322             |
| Sharp et al.       | 2008 | Scotland  | Caucasian              | Healthy person     | 117                   | 111 | 23  | 170      | 177 | 47  | 0.929             |
| Mohebbi et al.     | 2008 | Iran      | Iranian                | Hospital patients  | 117                   | 68  | 49  | 94       | 80  | 83  | 0.000             |
| Theodoratou        | 2008 | Scotland  | Caucasian              | Hospital patients  | 447                   | 441 | 111 | 439      | 455 | 116 | 0.908             |
| Zeybek et al.      | 2007 | Turkey    | Caucasian              | Hospital patients  | 18                    | 7   | 27  | 64       | 15  | 65  | 0.000             |
| Chang et al.       | 2007 | Taiwan    | Asian                  | Hospital patients  | 85                    | 86  | 24  | 92       | 87  | 16  | 0.467             |
| Murtaugh et al.    | 2007 | USA       | Mixed population       | Healthy person     | 362                   | 305 | 84  | 469      | 398 | 112 | 0.052             |
| Lima et al.        | 2007 | Brazil    | Brazilian              | Hospital patients  | 41                    | 46  | 15  | 143      | 127 | 30  | 0.817             |
| Van Guelpen et al. | 2006 | Sweden    | Caucasian              | Healthy person     | 123                   | 85  | 12  | 212      | 161 | 42  | 0.168             |
| Koushik et al.     | 2006 | USA       | Caucasian <sup>b</sup> | Healthy person     | 166                   | 145 | 38  | 355      | 327 | 112 | 0.010             |

|                                 |      |             |                  |                   |      |     |     |      |     |     |       |
|---------------------------------|------|-------------|------------------|-------------------|------|-----|-----|------|-----|-----|-------|
| Wang et al.                     | 2006 | Indian      | Dravidian        | Hospital patients | 257  | 43  | 2   | 255  | 36  | 0   | 0.261 |
| Le Marchand et al.              | 2005 | USA         | Mixed population | Healthy person    | 384  | 329 | 87  | 987  | 779 | 255 | 0.000 |
| Matsuo et al.                   | 2005 | Japan       | Asian            | Hospital patients | 106  | 114 | 36  | 289  | 348 | 134 | 0.100 |
| Jiang et al.                    | 2005 | China       | Asian            | Healthy person    | 51   | 59  | 15  | 134  | 143 | 62  | 0.032 |
| Otani et al.                    | 2005 | Japan       | Asian            | Hospital patients | 32   | 49  | 25  | 51   | 114 | 57  | 0.679 |
| Curtin et al.                   | 2004 | USA         | Caucasian        | Healthy person    | 729  | 717 | 149 | 886  | 852 | 226 | 0.331 |
| Ulvik et al.                    | 2004 | Norway      | Caucasian        | Healthy person    | 1103 | 899 | 157 | 1092 | 886 | 212 | 0.101 |
| Yin et al.                      | 2004 | Japan       | Asian            | Hospital patients | 270  | 330 | 85  | 278  | 367 | 133 | 0.528 |
| Kim et al.                      | 2004 | Korea       | Asian            | Hospital patients | 86   | 122 | 35  | 83   | 109 | 33  | 0.773 |
| Pufulete et al.                 | 2003 | UK          | Caucasian        | Hospital patients | 16   | 6   | 6   | 41   | 29  | 6   | 0.784 |
| Plaschke et al.                 | 2003 | Germany     | Caucasian        | Hospital patients | 133  | 120 | 34  | 149  | 159 | 38  | 0.648 |
| Heijmans et al.                 | 2003 | Netherlands | Caucasian        | Healthy person    | 7    | 7   | 4   | 392  | 322 | 61  | 0.649 |
| Toffoli et al.                  | 2003 | Italy       | Caucasian        | Healthy person    | 93   | 145 | 38  | 83   | 140 | 56  | 0.827 |
| Shannon et al.                  | 2002 | Australia   | Caucasian        | Healthy person    | 249  | 197 | 55  | 533  | 560 | 114 | 0.056 |
| Sachse et al.                   | 2002 | UK          | Caucasian        | Hospital patients | 238  | 199 | 53  | 271  | 272 | 49  | 0.092 |
| Matsuo et al.                   | 2002 | Japan       | Asian            | Hospital patients | 39   | 81  | 22  | 81   | 124 | 36  | 0.304 |
| Le Marchand et al. <sup>a</sup> | 2002 | USA         | Japanese         | Healthy person    | 126  | 153 | 43  | 138  | 182 | 77  | 0.225 |
| Le Marchand et al. <sup>a</sup> | 2002 | USA         | Caucasian        | Healthy person    | 66   | 64  | 19  | 66   | 81  | 24  | 0.915 |
| Le Marchand et al. <sup>a</sup> | 2002 | USA         | Hawaiian         | Healthy person    | 44   | 27  | 6   | 53   | 32  | 3   | 0.488 |
| Keku et al. <sup>a</sup>        | 2002 | USA         | African-American | Healthy person    | 198  | 43  | 3   | 264  | 59  | 6   | 0.214 |

|                            |      |           |                        |                   |     |     |     |     |     |     |       |
|----------------------------|------|-----------|------------------------|-------------------|-----|-----|-----|-----|-----|-----|-------|
| Keku et al. <sup>a</sup>   | 2002 | USA       | Caucasian              | Healthy person    | 144 | 140 | 24  | 265 | 223 | 51  | 0.681 |
| Ryan et al.                | 2001 | Ireland   | Caucasian              | Hospital patients | 49  | 73  | 14  | 439 | 326 | 83  | 0.052 |
| Slattery et al.            | 1999 | USA       | mixed population       | Hospital patients | 673 | 655 | 139 | 827 | 787 | 207 | 0.341 |
| Park et al.                | 1999 | Korea     | Asian                  | Hospital patients | 65  | 107 | 28  | 140 | 246 | 74  | 0.048 |
| Ma et al.                  | 1997 | USA       | Caucasian              | Healthy person    | 92  | 92  | 18  | 145 | 132 | 49  | 0.041 |
| Chen et al.                | 1996 | USA       | Caucasian              | Healthy person    | 67  | 64  | 13  | 280 | 263 | 84  | 0.079 |
| <b><i>MTHFR A1298C</i></b> |      |           |                        |                   |     |     |     |     |     |     |       |
| Pardini et al.             | 2011 | Czech     | Caucasian              | Hospital patients | 317 | 307 | 42  | 613 | 627 | 136 | 0.184 |
| Jokic et al.               | 2011 | Croatia   | Caucasian              | Healthy person    | 137 | 136 | 27  | 140 | 128 | 32  | 0.734 |
| Guimaraes et al.           | 2010 | Brazilian | African-Brazilians     | Hospital patients | 67  | 38  | 8   | 127 | 49  | 12  | 0.022 |
| Fernandez-Peralta          | 2009 | Spanish   | Caucasian              | Hospital patients | 84  | 53  | 6   | 57  | 44  | 2   | 0.048 |
| Theodoratou                | 2008 | Scotland  | Caucasian <sup>b</sup> | Hospital patients | 465 | 425 | 106 | 462 | 445 | 102 | 0.733 |
| Sharp et al.               | 2008 | Scotland  | Caucasian              | Healthy person    | 105 | 111 | 29  | 177 | 157 | 60  | 0.012 |
| Lima et al.                | 2007 | Brazil    | Brazilian              | Hospital patients | 68  | 28  | 6   | 191 | 93  | 16  | 0.297 |
| Chang et al.               | 2007 | Taiwan    | Asian                  | Hospital patients | 120 | 65  | 10  | 127 | 55  | 13  | 0.046 |
| Murtaugh et al.            | 2007 | USA       | mixed population       | Healthy person    | 364 | 320 | 67  | 438 | 430 | 111 | 0.725 |
| Koushik et al.             | 2006 | USA       | Caucasian <sup>b</sup> | Prospective study | 154 | 166 | 33  | 389 | 332 | 85  | 0.262 |
| Van Guelpen et al.         | 2006 | Sweeden   | Caucasian              | Healthy person    | 85  | 103 | 32  | 189 | 173 | 50  | 0.288 |
| Wang et al.                | 2006 | Indian    | Dravidian              | Hospital patients | 141 | 130 | 31  | 105 | 135 | 51  | 0.505 |

|                                 |      |           |                        |                   |     |     |     |     |     |     |       |
|---------------------------------|------|-----------|------------------------|-------------------|-----|-----|-----|-----|-----|-----|-------|
| Otani et al.                    | 2005 | Japan     | Asian                  | Hospital patients | 73  | 32  | 1   | 156 | 63  | 5   | 0.643 |
| Matsuo et al.                   | 2005 | Japan     | Asian                  | Hospital patients | 163 | 85  | 9   | 479 | 257 | 31  | 0.635 |
| Jiang et al.                    | 2005 | Chian     | Asian                  | Healthy person    | 93  | 30  | 1   | 226 | 103 | 6   | 0.137 |
| Curtin et al.                   | 2004 | USA       | mixed population       | Healthy person    | 751 | 691 | 153 | 926 | 822 | 216 | 0.100 |
| Plaschke et al.                 | 2003 | Germany   | Caucasian              | Healthy person    | 134 | 124 | 29  | 154 | 151 | 41  | 0.669 |
| Toffoli et al.                  | 2003 | Italy     | Caucasian              | Healthy person    | 122 | 129 | 25  | 133 | 121 | 25  | 0.735 |
| Matsuo et al.                   | 2002 | Japan     | Caucasian              | Hospital patients | 94  | 44  | 3   | 157 | 75  | 9   | 0.991 |
| Le Marchand et al. <sup>a</sup> | 2002 | USA       | Japanese               | Healthy person    | 205 | 100 | 10  | 244 | 136 | 15  | 0.459 |
| Le Marchand et al. <sup>a</sup> | 2002 | USA       | Caucasian              | Healthy person    | 78  | 56  | 14  | 86  | 65  | 20  | 0.163 |
| Le Marchand et al. <sup>a</sup> | 2002 | USA       | Hawaiian               | Healthy person    | 41  | 33  | 2   | 50  | 34  | 3   | 0.333 |
| Keku et al. <sup>a</sup>        | 2002 | USA       | African-American       | Healthy person    | 157 | 78  | 8   | 217 | 99  | 13  | 0.686 |
| Keku et al. <sup>a</sup>        | 2002 | USA       | Caucasian              | Healthy person    | 156 | 132 | 21  | 237 | 236 | 68  | 0.440 |
| <b><i>MTRR A66G</i></b>         |      |           |                        |                   |     |     |     |     |     |     |       |
| Pardini et al.                  | 2011 | Czech     | Caucasian              | Hospital patients | 113 | 330 | 218 | 291 | 671 | 410 | 0.592 |
| Jokic et al.                    | 2011 | Croatia   | Caucasian              | Healthy person    | 53  | 159 | 88  | 74  | 143 | 83  | 0.428 |
| Guimaraes et al.                | 2010 | Brazilian | African-Brazilians     | Hospital patients | 26  | 55  | 32  | 53  | 102 | 33  | 0.181 |
| Theodoratou                     | 2008 | Scotland  | Caucasian <sup>b</sup> | Healthy person    | 200 | 456 | 339 | 198 | 482 | 329 | 0.370 |
| Steck et al. <sup>a</sup>       | 2008 | USA       | African-Americans      | Healthy person    | 116 | 99  | 24  | 169 | 127 | 26  | 0.755 |
| Steck et al. <sup>a</sup>       | 2008 | USA       | Caucasian              | Healthy person    | 53  | 155 | 99  | 109 | 256 | 168 | 0.526 |

|                                 |      |           |                        |                   |      |     |     |      |     |     |       |
|---------------------------------|------|-----------|------------------------|-------------------|------|-----|-----|------|-----|-----|-------|
| Koushik et al.                  | 2006 | USA       | Caucasian <sup>b</sup> | Prospective study | 82   | 159 | 116 | 163  | 399 | 245 | 0.981 |
| Otani et al.                    | 2005 | Japan     | Asian                  | Hospital patients | 58   | 44  | 5   | 128  | 82  | 14  | 0.858 |
| Matsuo et al.                   | 2002 | Japan     | Asian                  | Hospital patients | 64   | 55  | 23  | 112  | 114 | 15  | 0.045 |
| Le Marchand et al. <sup>a</sup> | 2002 | USA       | Japanese               | Healthy person    | 148  | 140 | 26  | 193  | 170 | 30  | 0.374 |
| Le Marchand et al. <sup>a</sup> | 2002 | USA       | Caucasian              | Healthy person    | 26   | 81  | 40  | 45   | 86  | 39  | 0.865 |
| Le Marchand et al. <sup>a</sup> | 2002 | USA       | Hawaiian               | Healthy person    | 30   | 34  | 12  | 40   | 38  | 9   | 0.995 |
| <b><i>MTR A2756G</i></b>        |      |           |                        |                   |      |     |     |      |     |     |       |
| Guimaraes et al.                | 2010 | Brazilian | African-Brazilians     | Hospital patients | 82   | 26  | 5   | 144  | 37  | 7   | 0.028 |
| Theodoratou                     | 2008 | Scotland  | Caucasian <sup>b</sup> | Healthy person    | 630  | 332 | 37  | 662  | 318 | 30  | 0.267 |
| Steck et al <sup>a</sup>        | 2008 | USA       | African-Americans      | Healthy person    | 129  | 94  | 16  | 182  | 125 | 15  | 0.265 |
| Steck et al <sup>a</sup>        | 2008 | USA       | Caucasian              | Healthy person    | 205  | 91  | 11  | 347  | 171 | 15  | 0.263 |
| Koushik et al.                  | 2006 | USA       | Caucasian <sup>b</sup> | Prospective study | 222  | 121 | 20  | 529  | 239 | 36  | 0.180 |
| Matsuo et al.                   | 2005 | Japan     | Asian                  | Hospital patients | 165  | 78  | 14  | 499  | 247 | 25  | 0.404 |
| Ulvik et al.                    | 2004 | Norway    | Caucasian              | Prospective study | 1457 | 647 | 64  | 1402 | 693 | 97  | 0.336 |
| Pufulete et al.                 | 2003 | UK        | Caucasian              | Hospital patients | 19   | 8   | 1   | 45   | 23  | 8   | 0.072 |
| Matsuo et al.                   | 2002 | Japan     | Asian                  | Hospital patients | 90   | 47  | 5   | 156  | 79  | 6   | 0.276 |
| Le Marchand et al. <sup>a</sup> | 2002 | USA       | Asian                  | Healthy person    | 212  | 91  | 12  | 259  | 119 | 16  | 0.618 |
| Le Marchand et al. <sup>a</sup> | 2002 | USA       | Caucasian              | Healthy person    | 103  | 43  | 2   | 116  | 50  | 5   | 0.889 |
| Le Marchand et al. <sup>a</sup> | 2002 | USA       | Hawaiian               | Prospective study | 57   | 17  | 2   | 72   | 14  | 1   | 0.734 |

---

|           |      |     |                    |                   |     |    |    |     |     |    |       |
|-----------|------|-----|--------------------|-------------------|-----|----|----|-----|-----|----|-------|
| Ma et al. | 1998 | USA | Caucasian-American | Prospective study | 248 | 98 | 10 | 317 | 137 | 22 | 0.154 |
|-----------|------|-----|--------------------|-------------------|-----|----|----|-----|-----|----|-------|

---

Note: <sup>a</sup> They were different case-control studies in one publications;

<sup>b</sup> most of the subjects were Caucasians;

<sup>c</sup> p for Hardy-Weinberg equilibrium test in controls;

*MTHFR*, Methylentetrahydrofolate Reductase; *MTRR*, methionine synthase reductase; *MTR*, Methionine synthase.
